# Supplementary material for: Isogenic mice exhibit sexually-dimorphic DNA methylation patterns across multiple tissues
Source: PubMed Central journal article supplement (PMC5729250; doi:10.1186/s12864-017-4350-x), 2017-12-13
Supplement: 12864_2017_4350_MOESM1_ESM.pdf [file 12864_2017_4350_MOESM1_ESM.pdf]

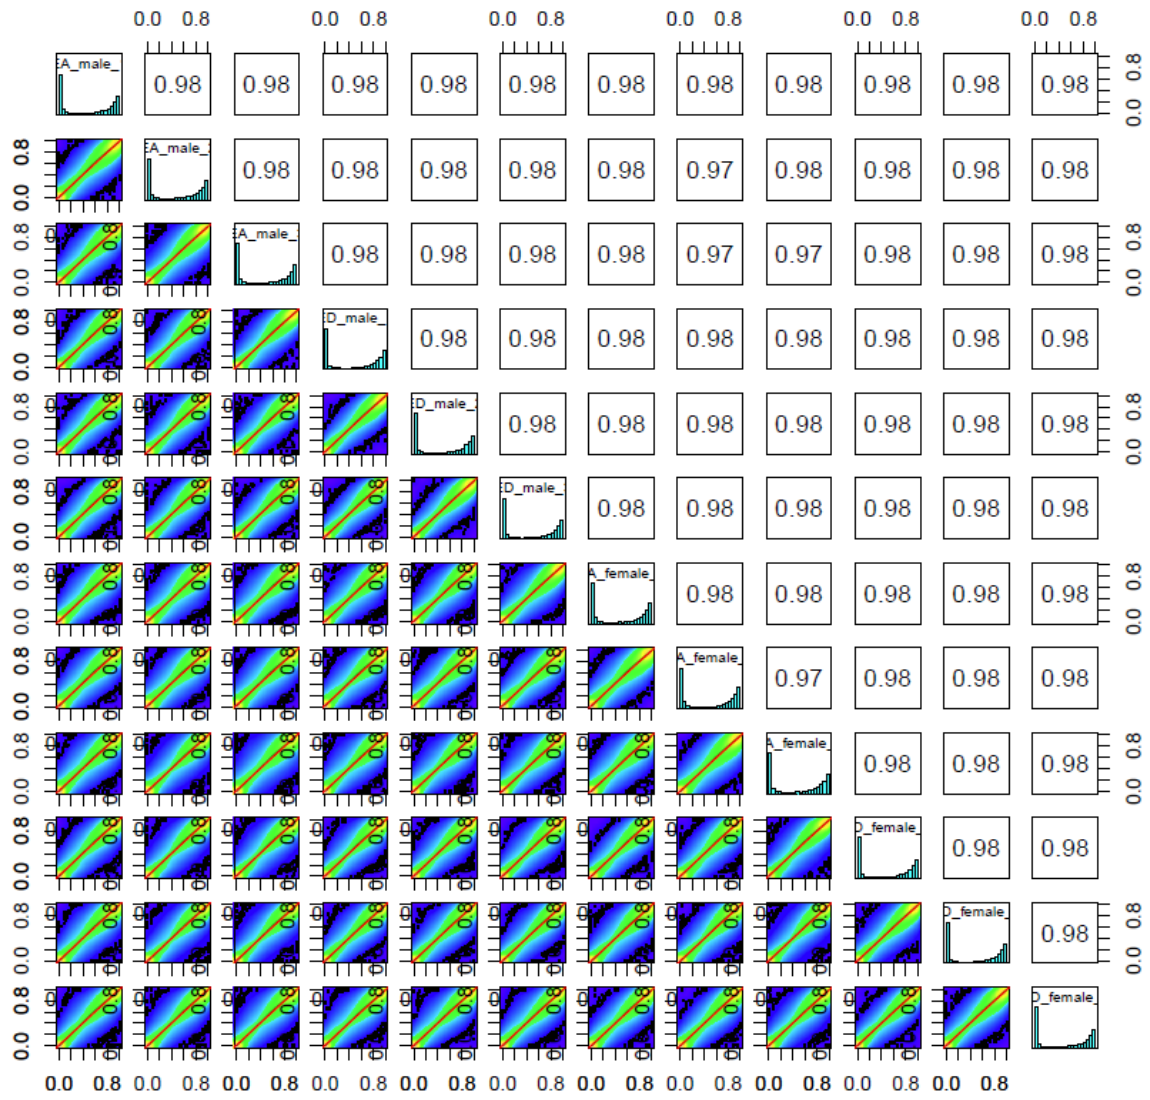

Additional File 1

Figure S1: Correlation matrices and corresponding correlation coefficients for each liver RRBS dataset.
